# Supplementary material
Source: PubMed Central journal article supplement (PMC6475425)
Supplement: pnas.1819897116.sapp.pdf [file pnas.1819897116.sapp.pdf]

# PNAS

www.pnas.org

1  
2  
3  
4  
5  
6  
7  
8  
9  
10  
11  
12  
13  
14  
15  
16  
17  
18  
19  
20  
21  
22  
23  
24  
25  
26  
27  
28  
29  
30  
31  
32  
33  
34

<http://www.pnas.org/page/authors/submission#preparation>

## Supplementary Information for:

### **Critical symbiont signals drive both local and systemic changes in diel and developmental host gene expression**

Silvia Moriano-Gutierrez, Eric J. Koch, Hailey Bussan, Kymberleigh Romano, Mahdi Belcaid, Federico E. Rey, Edward Ruby, and Margaret McFall-Ngai

Margaret McFall-Ngai  
Email: [mcfallng@hawaii.edu](mailto:mcfallng@hawaii.edu)

#### **This PDF file includes:**

- Supplementary text
- Figs. S1 to S10
- Tables S1 to S3
- Captions for movies S1 to S3
- Captions for databases S1 to S10
- References for SI reference citations

#### **Other supplementary materials for this manuscript include the following:**

- Movies S1 to S3
- Datasets S1 to S10

35 **Supplementary Information Text**

36

37 **SI Results**

38 **Sequencing, Assembly and Annotation.** We sequenced total RNA isolated from 45  
39 samples across 3 distinct tissue types and two developmental stages. The 2.2 billion  
40 paired-end reads were de novo assembled, yielding 788,971 contigs (Fig. S1 and Dataset  
41 S1). Ninety percent of the expression was represented by only 16,295 transcripts, and  
42 70% of all transcripts with an open reading frame had BLASTx annotations, which had  
43 highest representation within closely related taxa (Fig. S1C and D). For all three squid  
44 organs considered together, the 'biological process' category constituted the highest  
45 percentage (47%) of Gene Ontology (GO) mapping of the transcripts, followed by 'cellular  
46 component' (35%) and 'molecular function' (18%) (Fig. S1E).

47

48 **SI Materials and Methods**

49 **General Procedures.** Adult *Euprymna scolopes* squid were collected from Paikō Lagoon,  
50 Oahu, Hawai'i, and either transferred to outdoor tanks to maintain natural light cues or  
51 transported to the University of Wisconsin (Madison, WI) and maintained in the laboratory  
52 as previously described (1). Juveniles from the breeding colony were collected within  
53 minutes of hatching, and placed in either filter-sterilized Instant Ocean (FSIO) artificial  
54 seawater (Aquarium Systems, Mentor, OH) or filter-sterilized coastal ocean water. Within 2  
55 h of hatching, juveniles were either made symbiotic (SYM) by overnight exposure to cells  
56 of *Vibrio fischeri* in filter-sterilized ocean water (FSIO), or kept aposymbiotic (APO) (2). For  
57 all experiments, animals were maintained on a 12-h light-dark cycle and, when needed,  
58 squid males were raised for 5-6 months to adulthood, following standard procedures (3).  
59 All of the adult squid used, including both, reared or wild-caught, were males, and had  
60 mantle lengths between 2.51 and 2.82 cm, indicating that they were fully mature.

61 Two strains of *V. fischeri* were used in this study: the wild-type ES114 (2) and its dark-  
62 mutant derivative EVS102 ( $\Delta lux$ ), in which the genes required for luminescence were  
63 deleted (4). To prepare the strains as an inoculum, they were first cultured overnight in  
64 Luria-Bertani salt medium (LBS) (5). They were then subcultured (1:100) into seawater  
65 tryptone medium (SWT) (2), and grown to mid-log phase at 28 °C with shaking. This  
66 subculture was diluted into seawater to a final concentration of 3,000-5,000 cells/ml, and  
67 juvenile squid added. Colonization of the host was monitored by checking for animal  
68 luminescence with a TD 20/20 luminometer (Turner Designs, Sunnyvale, CA) or, in

69 animals colonized by EVS102, by plating the surrounding water after the dawn expulsion.  
70 Juvenile animals were collected at the indicated times after inoculation, anesthetized in  
71 seawater containing 2% ethanol, and stored frozen at -80 °C in RNAlater (Ambion), as  
72 previously described (6), until further processing.

73

74 **Host Organ RNA Extraction and Sequencing.** Total RNA was purified using QIAGEN  
75 RNeasy columns, immediately followed by treatment with TURBO™ DNase (Ambion). The  
76 RNA concentration for each sample was then determined with a Qubit RNA BR assay kit  
77 (Invitrogen). The Illumina TruSeq protocol v2.0, with polyA selection, was used throughout  
78 to generate bar-coded sequencing libraries for all 24 h samples. Paired-end 100-bp  
79 sequencing was performed at the University of Wisconsin-Madison Biotechnology and  
80 Gene Expression Center. The Illumina TruSeq Stranded mRNA Sample Prep with polyA  
81 selection v4.0 protocol was used for all adult samples of light organ and gill tissues (at the  
82 University of Utah High-Throughput Genomics Core Facility) and for eye tissues (at  
83 SeqMatic, Fremont, CA. All sequencing data was used to build the reference  
84 transcriptome (see below).

85

86 **De Novo RNA-Seq Assembly and Annotation.** Trimmomatic (7), was used to trim and  
87 discard reads containing the Illumina adaptor sequences with a minimum length threshold  
88 of 36 bp. A total of 2.2 billion paired-end reads were *de novo* assembled into the Trinity-  
89 v2.4.0 RNA-Seq assembler (8) incorporating an *in silico* normalization step ([Dataset S1](#)).  
90 A BLASTx search against the NCBI non-redundant protein database was used to annotate  
91 the reference transcriptome. For the functional annotations of the reference transcriptome,  
92 Gene Ontology (GO) mapping of the transcripts and gene set enrichment analysis (GSEA)  
93 (9) as performed with Blast2go software (10).

94

95 **Transcript Abundance Estimation and Differential Expression Analysis.** Reads were  
96 mapped against the reference transcriptome with bowtie2 (11), and their relative  
97 expression values for each tissue were estimated with RSEM software (12). The statistical  
98 analysis of the RNA-Seq data was performed with the R package edgeR (13), identifying  
99 the significantly differentially expressed transcripts in each of the pairwise comparisons,  
100 and employing a false discovery rate (FDR) threshold of 0.05 with at least a 2-fold change  
101 in expression difference. However, when we determined the sets of tissue-specific genes,  
102 the cut off for fold-change difference was set to 8-fold. Only genes with expression values

103 of >0.5 FPKM (fragments per kilobase of transcript per million fragments mapped) in at  
104 least 2 samples of the pairwise comparisons were included in the analysis. The count data  
105 of the remaining genes were normalized and log-transformed in edgeR. All normalized  
106 mean expression values are shown in [Dataset S2](#). All normalized expression values were  
107 used to determine the threshold of expression for all tissues, where a gene is considered  
108 expressed if it has an expression value equal to or larger than 0.5 FPKM in all samples of  
109 that tissue. Due to the large differences in expression profiles of the different tissues at  
110 both developmental stages, the determination of expressed genes per tissue was  
111 performed separately for juvenile and adult samples. Venn diagrams were drawn using the  
112 venn function of ggplot R package. Heatmaps of expression values and hierarchical  
113 clustering were created with heatmap3 and hclust functions, respectively, in the R  
114 environment (14). Statistical enrichment of Gene Ontology (GO) terms for differentially  
115 expressed genes was performed in Blast2Go software (10) using the Fisher exact test with  
116 an FDR<0.01. In addition, gene-set weighted enrichment analysis (GSEA) with 500  
117 permutations and FDR < 0.1 was performed on the differentially expressed transcripts  
118 ([Dataset S10](#)). No significant difference was seen for the top enriched terms between the  
119 two methods.

120

121 **Quantitative NanoString nCounter Analysis and Gene Transcript Quantification by**  
122 **qPCR.** The nCounter Custom CodeSet ([Dataset S3](#)) Kit (NanoString Technologies) was  
123 used to detect changes in gene expression following the manufacturer's protocol. Total  
124 RNA, was extracted as described above. Assay and spike-in controls were used for  
125 normalization based on identical amounts of input RNA. Welch's t-test analysis was  
126 performed with nSolverAnalysis Software v3.0. Ribosomal protein 19L, serine  
127 hydroxymethyl transferase and peptidyl-prolyl cis-trans isomerase were used as internal  
128 reference genes to normalize expression levels of each candidate gene, using their  
129 geometric means (15). Pearson correlation of expression data obtained by RNA-Seq and  
130 NanoString was calculated with GraphPad Prism v7.00 software. Host gene expression  
131 changes were in addition measured by qPCR using LightCycler<sup>®</sup> 480 SYBR Green I  
132 Master Mix (Roche). Total RNA, was extracted as described previously. Synthesis of the  
133 single-stranded complementary DNA was performed with SMART MMLV Reverse  
134 Transcriptase (Clontech) using Oligo(dT)12–18 primers (Invitrogen). All reactions were  
135 performed with no-RT and no-template controls to confirm that the reaction mixtures were  
136 not contaminated. Specific primers ([Table S1](#)) were designed with Primer3plus (16).

137 Primer efficiencies ranged between 98% and 105% with an annealing temperature of 60  
138 °C for all primer pairs. The amplification efficiency was determined by in-run standard  
139 curves with a 10-fold dilution template. Each reaction was done in duplicate with a starting  
140 level of 12.5 ng cDNA. The generation of specific PCR products was confirmed by melting-  
141 curve analysis. Expression analyses of candidate genes were normalized to the geometric  
142 mean of the expression levels of three reference genes: ribosomal protein 19L, serine  
143 hydroxymethyl transferase and heat-shock protein 90. Analyses were performed with the  
144 MCMC.qpcr R package (17) using an *informed* MCMC qpcr model. Results are reported  
145 as log<sub>2</sub> fold-changes with *p*-values calculated using the posterior distribution and corrected  
146 for multiple testing. Bar graphs of expression values were produced with GraphPad Prism  
147 v7.00 software.

148

149 **Experimental Procedures with Mice.** All experiments involving mice were performed  
150 using protocols approved by the University of Wisconsin - Madison Animal Care and Use  
151 Committee. C57BL/6 mice were maintained in a controlled environment in plastic flexible-  
152 film gnotobiotic isolators [germ-free (GF) mice] or filter-top cages [conventionally raised  
153 (CONVR) mice] under a strict 12:12 light:dark cycle, and received sterilized water and food  
154 *ad libitum*. The sterility of germ-free animals was assessed by incubating freshly collected  
155 fecal samples under aerobic and anaerobic conditions using standard microbiology  
156 methods. In total, six 8-week-old female mice, three GF and three CONVR, had both left  
157 and right eyes collected 5 h after facility lights were turned on. Animals were euthanized  
158 by cervical dislocation and were non-fasted at the time of sacrifice. Collected tissue was  
159 preserved in RNAlater, left overnight at 4 °C, and shipped frozen to the University of  
160 Hawaii at Manoa, where samples were kept at -80 °C until further processing.

161

162 **RNA Extraction from Mouse Eyes.** Total RNA from eye tissue was purified with RNeasy  
163 Fibrous Tissue Mini Kit (QIAGEN), immediately followed by treatment with TURBO™  
164 DNase (Ambion) and quantified with Qubit RNA BR assay kit (Invitrogen). The Illumina  
165 TruSeq protocol v4.0, TruSeq Stranded RNA kit with Ribo-Zero Gold with polyA selection  
166 was done. Sequencing was performed with HiSeq 125 Cycle Paired-End sequencing V4  
167 (New York University, Genome Technology center). Sequencing reads were trimmed and  
168 cleaned of adapters with Trimmomatic (7) and then mapped to the mouse genome. Then  
169 gene annotations (mm\_ref\_GRCm38.p4) were derived using TopHat v2.013 (18) with  
170 default settings for paired-end samples. Samtools (19) was used to index and sort the

171 alignments and FeatureCounts (20) in paired-end (-p) exon mode to assign their gene  
172 annotations. To identify differentially expressed transcripts the R package edgeR (13) was  
173 implemented with a threshold of FDR<0.05 and 2-fold change difference in expression.

174

175 **Whole-mount Hybridization Chain Reaction, Fluorescence in Situ Hybridization**  
176 **(HCR-FISH) to Detect the Transcript of Atrial Natriuretic-Converting Enzyme.** HCR-  
177 FISH probes (version3) specific for the host atrial natriuretic-converting enzyme and *V.*  
178 *fischeri* 16S RNA (Table S2) were designed and provided by Molecular Instruments  
179 ([www.molecularinstruments.org](http://www.molecularinstruments.org)). Juvenile squid were collected 24 h post-colonization  
180 under standard procedures explained previously, with the following modifications. After  
181 anesthetization with 2% ethanol in seawater, squid were fixed overnight in 4%  
182 paraformaldehyde in marine phosphate-buffered saline (mPBS) (3) at 4 °C. The light  
183 organs were then dissected out and the hybridization procedure was followed as  
184 described in (21), with the following modifications. Probe hybridization was conducted at  
185 37 °C in 30% DNA hybridization buffer (version3; Molecular Instruments). Probe wash  
186 buffer (version 3) was used to remove nonspecifically bound probe as specified earlier  
187 (21). Samples were counterstained with TO-PRO-3 (Thermo Fisher Scientific) to label host  
188 nuclei, and imaged using a Zeiss LSM 710 confocal microscope. Z-stack images of 1024 x  
189 1024 pixels were acquired at acquisition speed 7, with an averaging of 4 images.  
190 Fluorescence intensity for all sections of each Z-stack was measured using FIJI (22). The  
191 brightness of the final images was adjusted for visual clarity using IMARIS bitplane  
192 software.

193

#### 194 **ACCESSION NUMBERS**

195 The data have been deposited with links to BioProject accession numbers  
196 PRJNA473394, PRJNA498343, and PRJNA498345 in the NCBI BioProject  
197 database (<https://www.ncbi.nlm.nih.gov/bioproject/>).

198

199

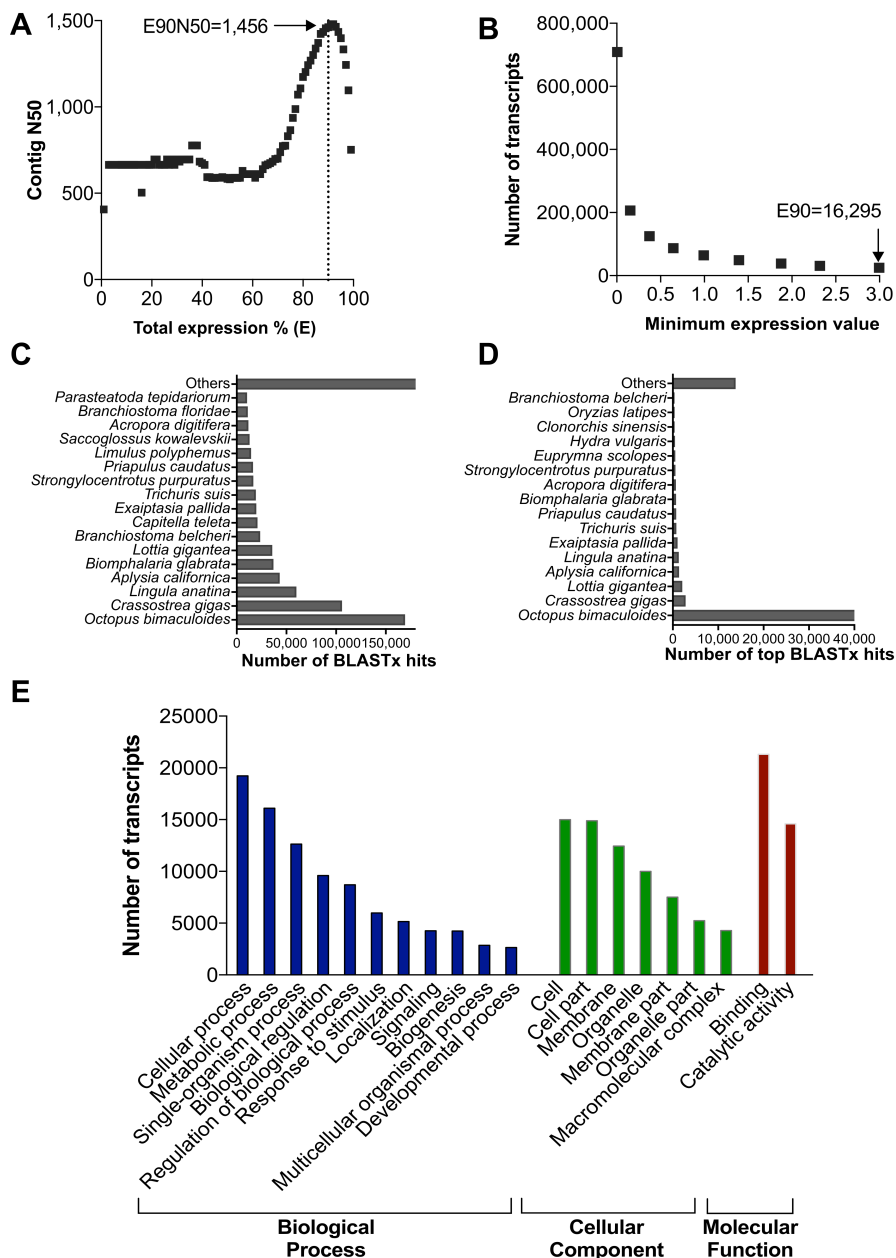

200  
201  
202  
203  
204  
205  
206  
207  
208  
209  
210  
211  
212  
213

**Fig. S1. Assessment of the assembly quality and read representation of the *E. scolopes* transcriptome and its annotation.** **A.** The N50 contig value is calculated from the cumulative sets of the top most highly expressed transcripts that represent the total TMM (Trimmed Mean of M-values)-normalized expression data. E90N50 = 1,456. **B.** The number of most highly expressed transcripts is plotted against the minimum expression value. Ninety percent of the total transcriptional activity is represented by a set of 16,295 transcripts. The expression value is measured as fragments per kilobase million reads (FPKM). **C.** BLASTx species distribution for all blast hits for the squid transcriptome. **D.** Species distribution of blast hits for all top-hit species for the squid transcriptome. To identify homologous genes, the squid transcripts were compared (using BLASTx) against the non-redundant protein database (nr). The E-value cut-off was set at  $1.0 \times 10^{-3}$ . **E.** Functional annotation of *E. scolopes* transcriptome at the 2<sup>nd</sup>-level GO terms (Dataset S1).

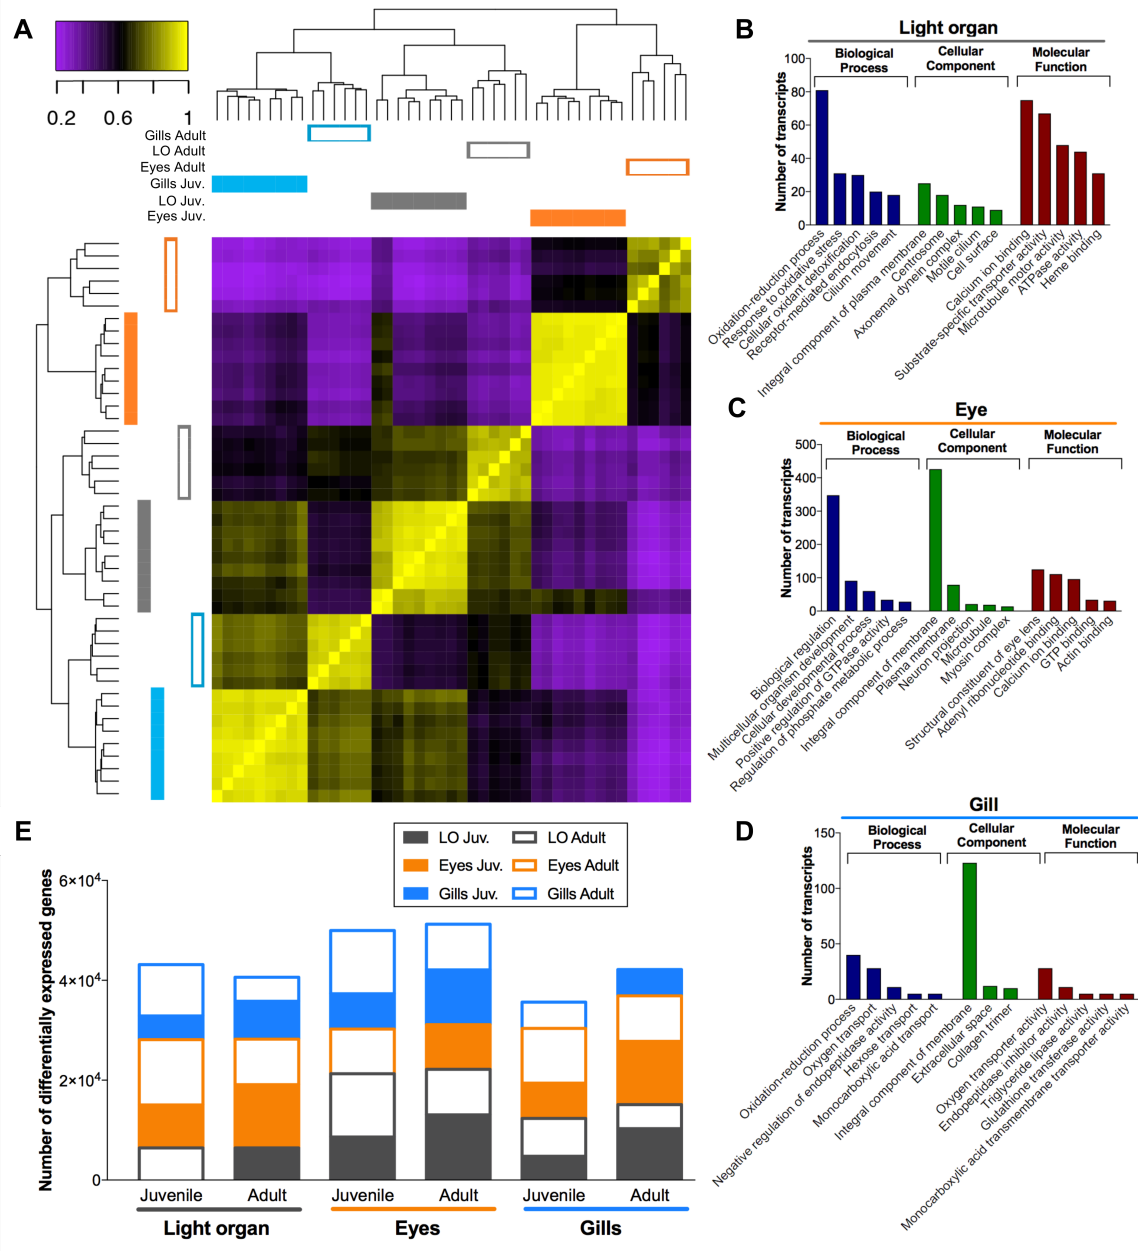

214  
215  
216  
217  
218  
219  
220  
221  
222  
223  
224  
225

**Fig. S2. Data analysis of differentially expressed transcripts across each set of organs, identifying transcripts enriched in specific organs ( $P_{adj} < 0.05$ , fold-change  $> 8$ ).** **A.** Hierarchically clustered heatmap based on 21,013 differentially expressed genes, visualizing a correlation matrix of the reference transcriptome. **B-D.** Top 5 GO term enrichment for each category. GO enrichment ( $p < 0.01$  FDR corrected) for differentially expressed genes in **B.** Light organ, **C.** Eyes and **D.** Gills. **E.** The number of differentially expressed genes in each of the five pairwise comparisons between the three analyzed organs, for each of two developmental stages ( $P_{adj} < 0.05$ , fold-change  $> 8$ ). LO= light organ, Juv= 24-h. (Datasets S2 and S3).



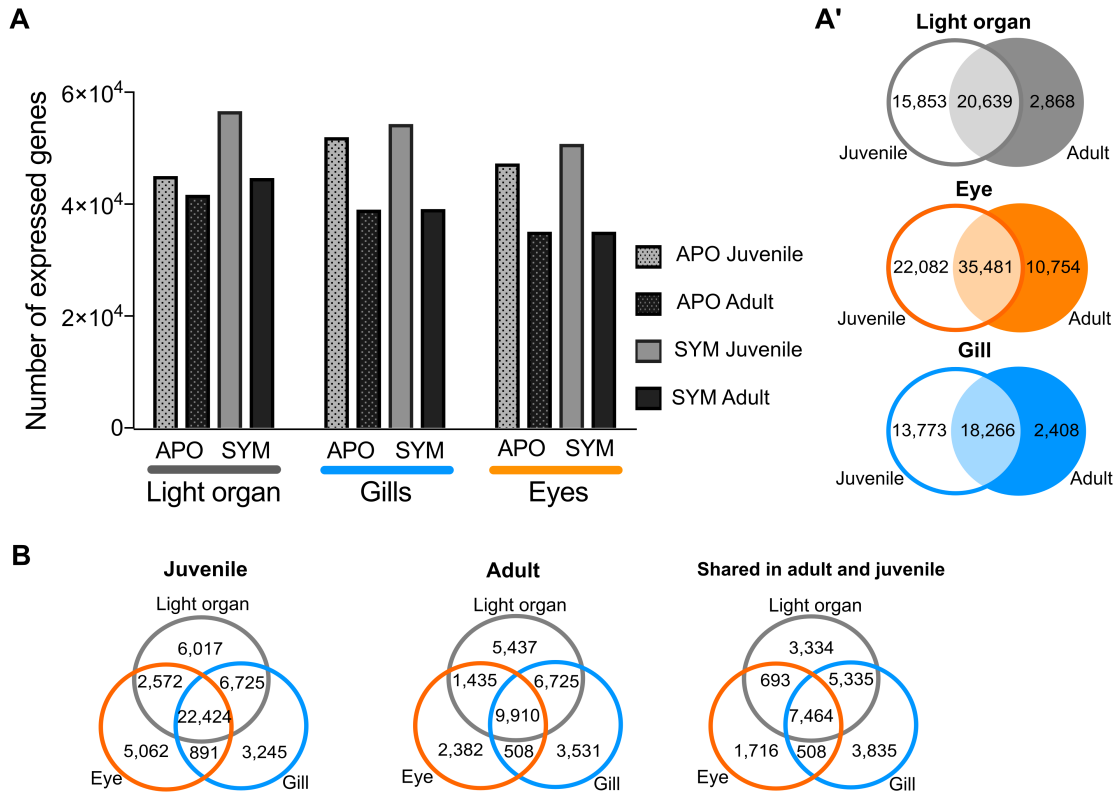

226  
 227  
 228  
 229  
 230  
 231  
 232  
 233  
 234  
 235  
 236

**Fig. S3. Symbiosis-responsive genes shared across squid organs and stages of development.** **A.** Summary of distribution of gene abundance across two developmental stages (juvenile and adult) in aposymbiotic (APO) and symbiotic (SYM) individuals. **A'.** Venn diagrams of expressed genes shared between juveniles and adults in each organ. A gene is considered expressed when FPKM > 0.5 in at least two samples. **B.** Venn diagrams of shared expressed genes when FPKM > 0.5 in all samples within the comparison. ([Dataset S1](#)).

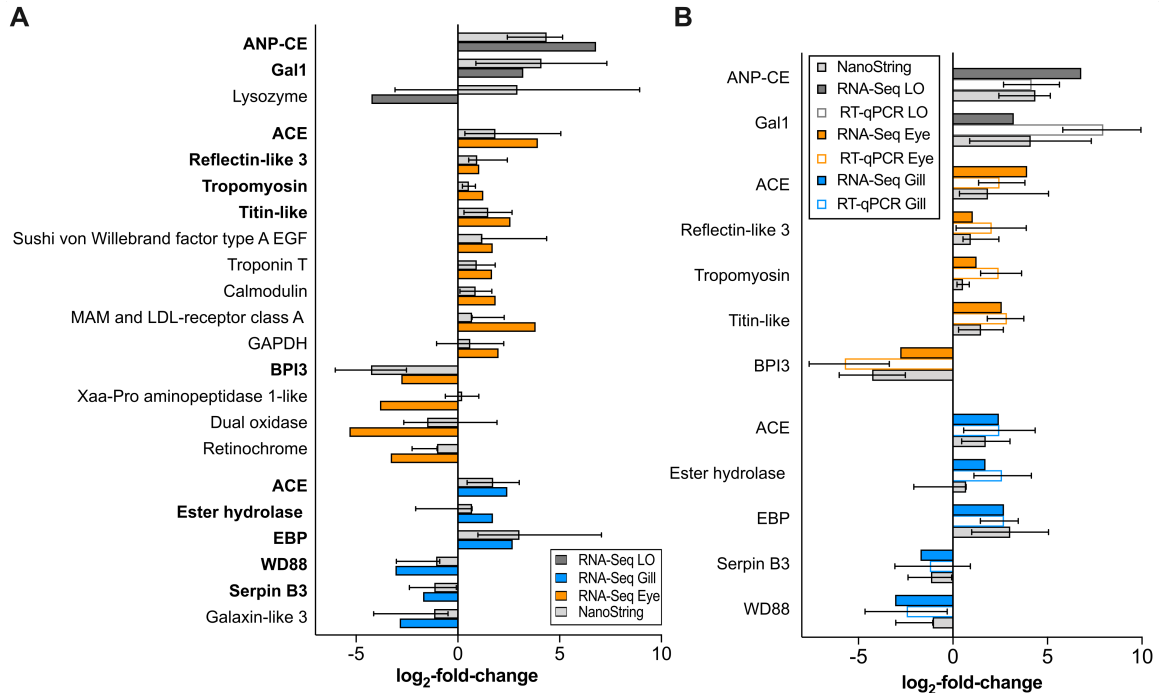

237  
 238  
 239  
 240  
 241  
 242  
 243  
 244  
 245  
 246  
 247  
 248  
 249  
 250  
 251  
 252  
 253  
 254  
 255  
 256

**Fig. S4. Validation of adult RNA-seq data by NanoString Technologies.** **A.** The log<sub>2</sub>-fold change values determined by NanoString Technologies validated 21 of the set of 22 differentially expressed genes selected from the mature eye, gill and symbiotic light organ (LO) tissues. Significant correlations between data based on NanoString and RNA-Seq expression profiles were observed (Pearson coefficient correlation of 0.7119, p < 0.0002), indicating the reliability of RNA-Seq for gene-expression analyses. In bold, genes co-validated with RT-qPCR. **B.** Comparison of log<sub>2</sub>-fold change values of transcripts of the same three organs determined by RT-qPCR and NanoString Technologies. (Pearson coefficient of correlation = 0.992, p < 0.01). Genes were either up-regulated (+); or, down-regulated (-) with symbiosis. ANP-CE; atrial natriuretic peptide-converting enzyme; ACE: angiotensin-converting enzyme, BPI3: bactericidal/permeability-increasing protein 3; GAPDH: glyceraldehyde-3-phosphate dehydrogenase; Ester hydrolase: ester hydrolase C11orf54 homolog; EBP: emopamil-binding protein; WD88: WD repeat-containing protein 88. Error bars in the NanoString and RT-qPCR expression data represent 95% CI (Dataset S4).

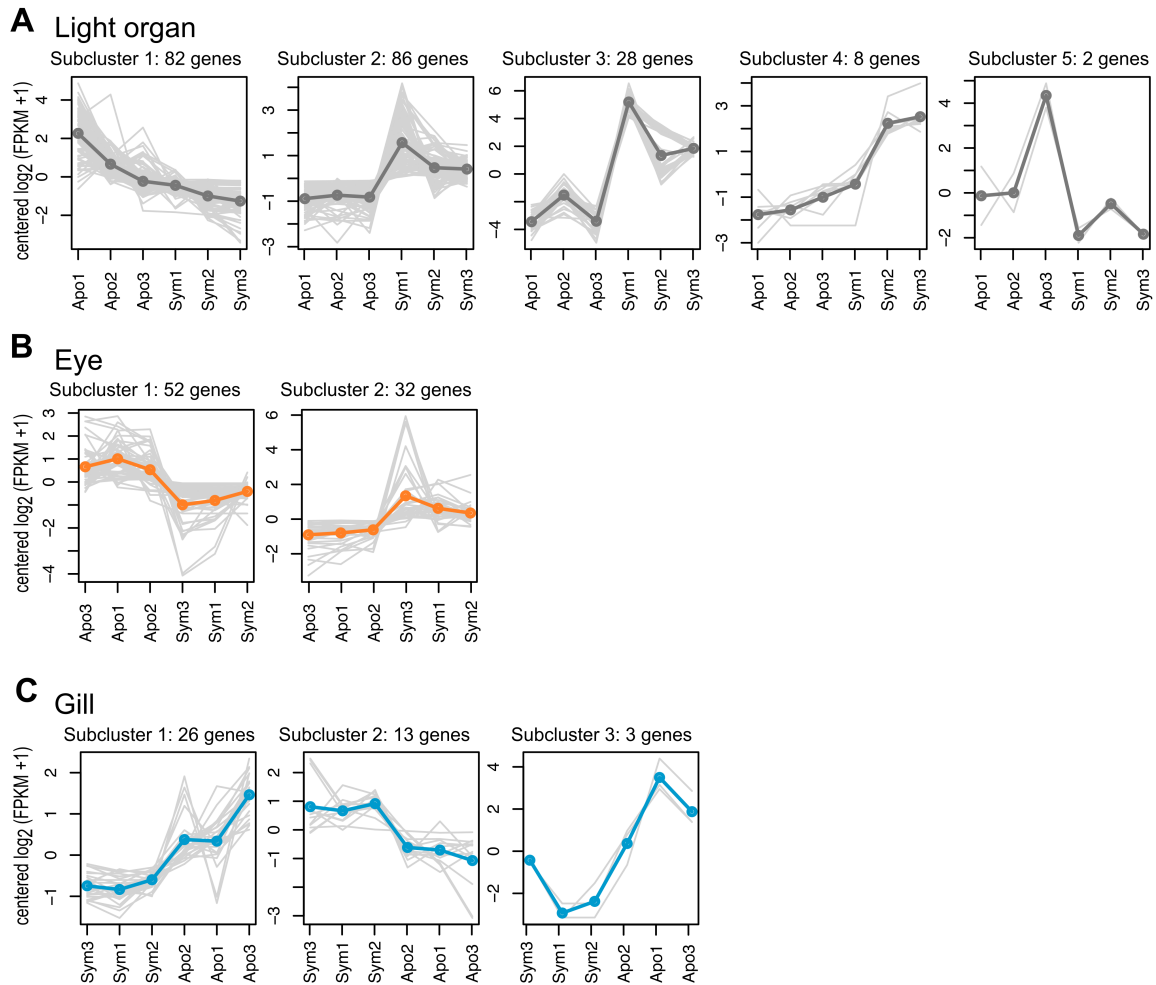

258  
259  
260  
261  
262  
263  
264  
265  
266  
267

**Fig. S5. Patterns of differential gene expression in response to light-organ symbiosis in adult tissues.** Differentially expressed genes were grouped into subclusters at 60% of height of the hierarchically clustered gene tree of gene expression. The y-axis gives the median-centered  $\log_2$  FPKM, whereas horizontal axes list the different samples. The gray lines represent all mean expression level for all genes in each sub-cluster in **A.** light organ (dark gray); **B.** eye (orange), and **C.** gill (blue). Sym: symbiotic; Apo: aposymbiotic.

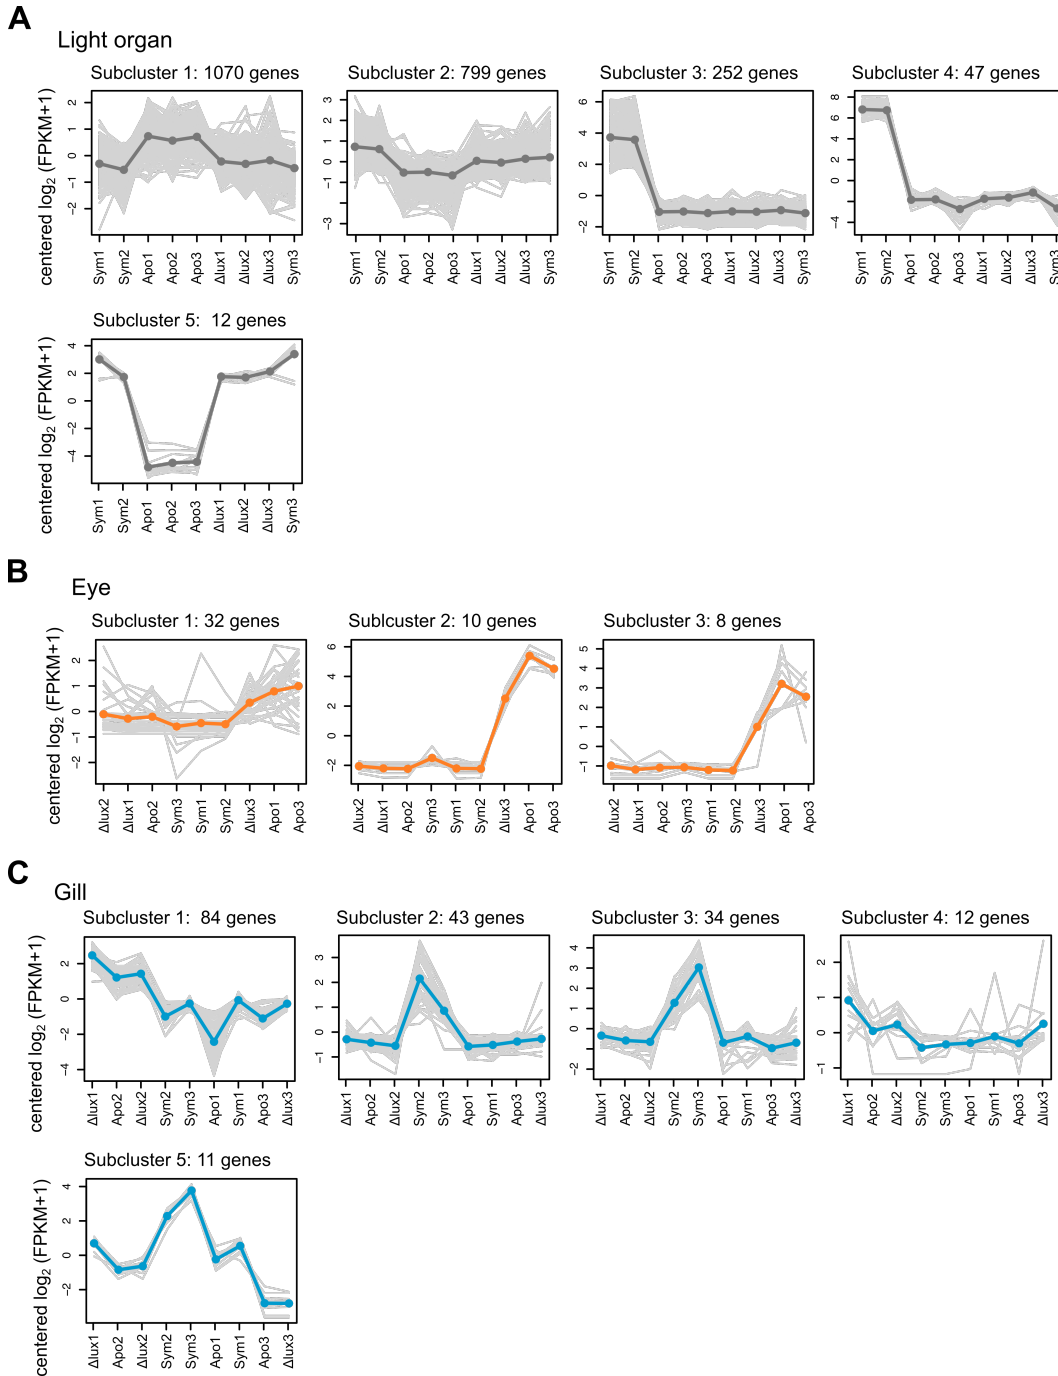

268  
269

270 **Fig. S6. Patterns of differential gene expression in juvenile tissues in response to**  
 271 **light organ symbiosis by luminous and dark bacteria.** Differentially expressed genes  
 272 were grouped into subclusters at 60% of height of the hierarchically clustered gene tree  
 273 of gene expression. The y-axis gives the median-centered  $\log_2$  FPKM, whereas  
 274 horizontal axes represent the different samples. The light gray lines represent all mean  
 275 expression level for all genes in each sub-cluster. **A.** light organ (dark gray), **B.** eye  
 276 (orange), and **C.** gill (blue). Apo (= APO): aposymbiotic; Sym (= SYM): symbiotic,  
 277 colonized by the wild-type strain ES114;  $\Delta$ lux (= SYM-dark): symbiotic, colonized by the  
 278 dark mutant  $\Delta$ lux strain EVS102 (4).

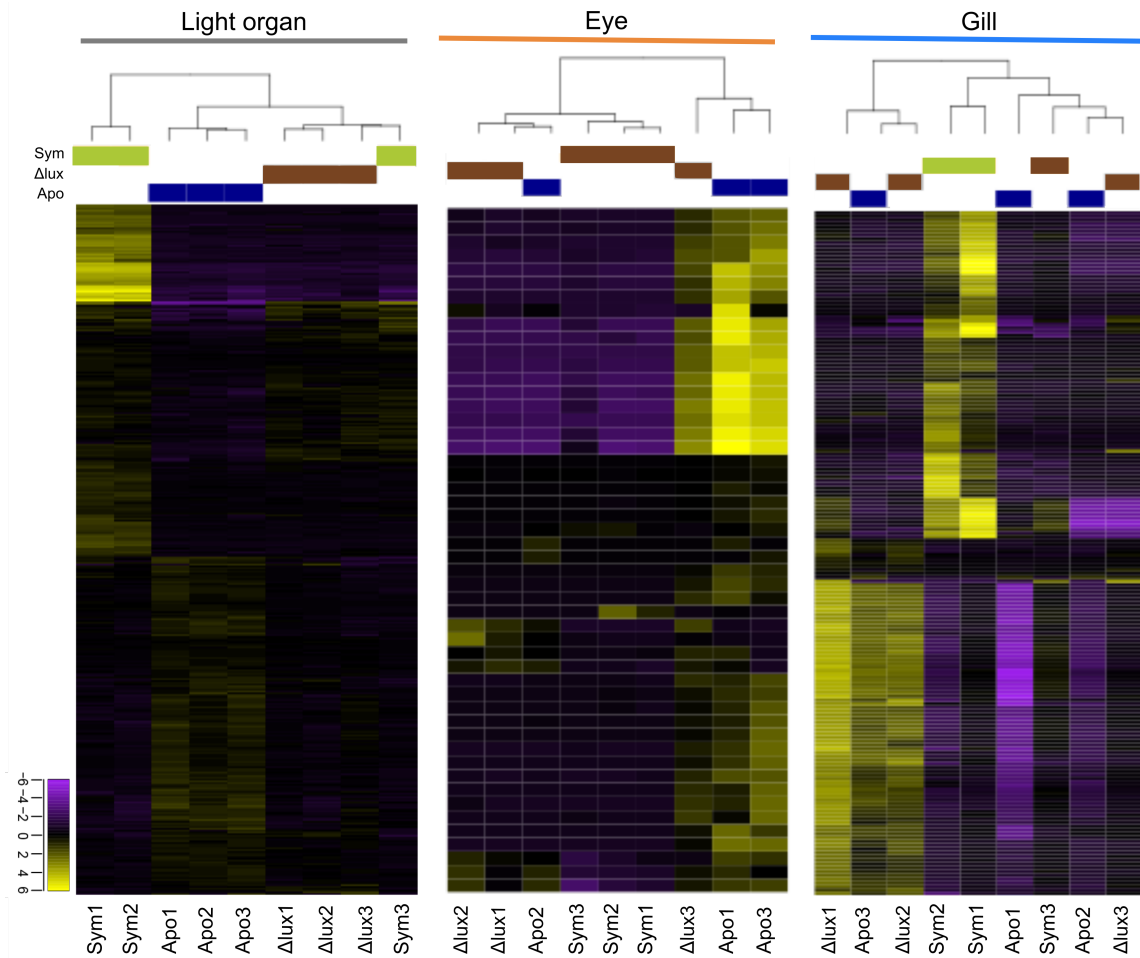

280  
 281  
 282  
 283  
 284  
 285  
 286  
 287  
 288  
 289

**Fig. S7. Transcriptional profiles of juvenile organs in response to light organ colonization by luminous or dark symbionts after 24 h.** A heat map of expression values,  $\log_2$ -transformed and median centered, for genes significantly differentially expressed ( $>2$  fold,  $P_{\text{adj}} < 0.05$ ) in juvenile light organ, eye and gill. Apo (= APO): aposymbiotic, (dark blue); Sym (= SYM): symbiotic, colonized with the luminous wild-type strain (in green);  $\Delta lux$  (= SYM-dark): symbiotic, colonized by a dark mutant  $\Delta lux$  strain (in maroon).

290  
291

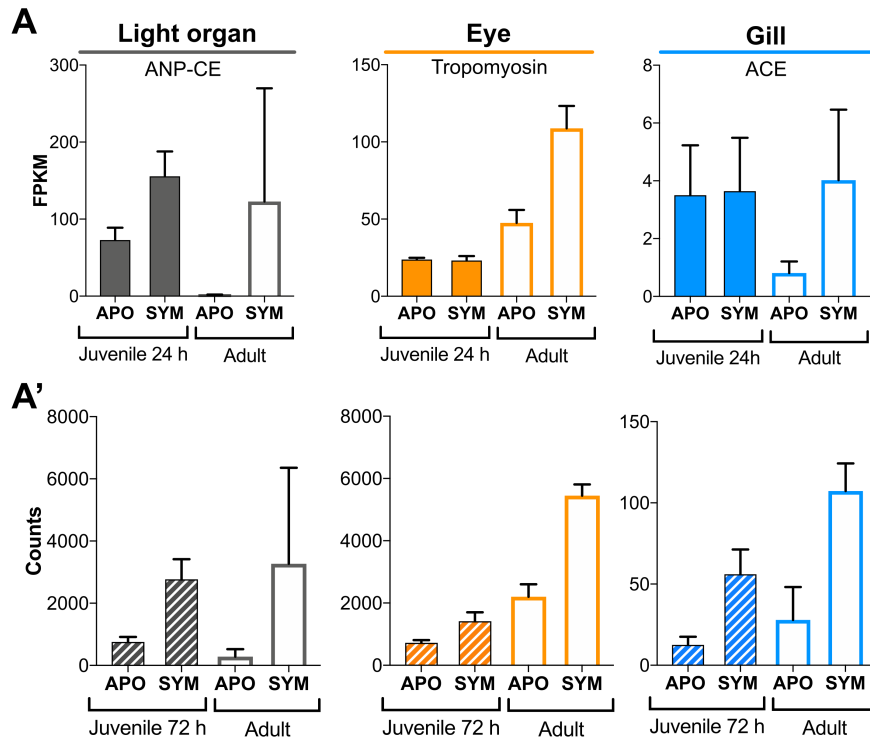

292  
293  
294  
295  
296  
297  
298  
299  
300  
301  
302

**Fig. S8. Examples of symbiosis-responsive gene expression compared between juvenile and adult organs. A.** Expression of three genes determined by RNA-Seq in 24-h juvenile and in adult animals that had been shown to be differentially regulated in APO and SYM adults, but not in all tissues of 24-h juveniles. **A'.** Expression of the same set of genes determined by NanoString Technologies in 72-h juvenile and in adult animals. APO: aposymbiotic; SYM: symbiotic; ANP-CE: atrial natriuretic-converting enzyme, ACE: angiotensin-converting enzyme.

303  
 304  
 305  
 306  
 307  
 308  
 309

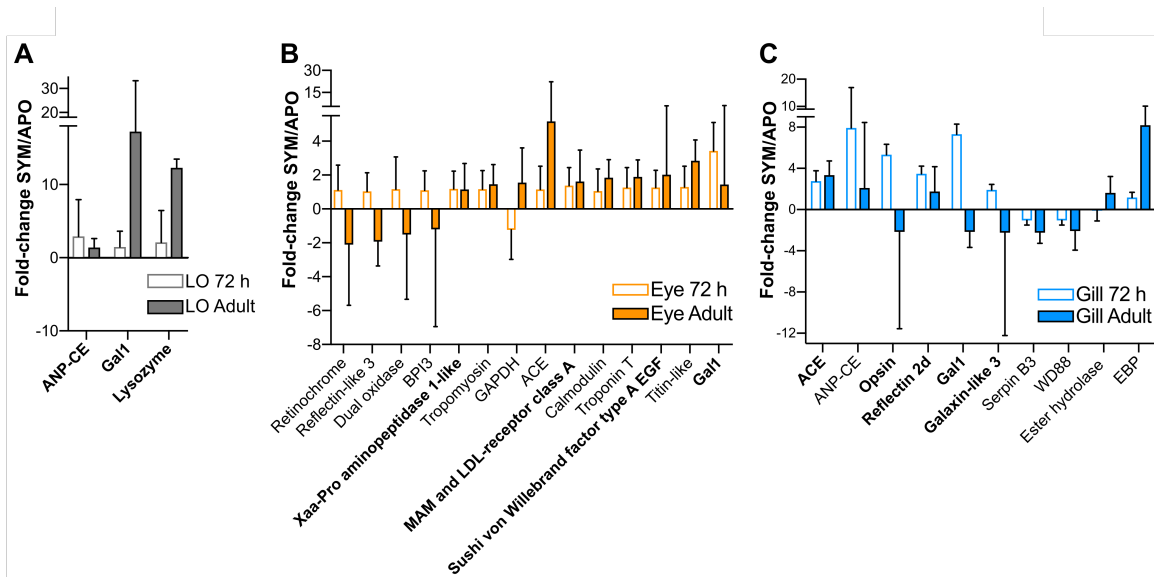

310  
 311  
 312  
 313  
 314  
 315  
 316  
 317  
 318  
 319  
 320  
 321  
 322  
 323  
 324  
 325

**Fig. S9. Differential gene expression early in symbiosis by NanoString Technologies.** The log<sub>2</sub>-fold change (SYM/APO) values determined by NanoString Technologies, comparing expression values of genes in symbiotic and aposymbiotic squid: light organ (LO) (**A**), eye (**B**) and gill (**C**). ANP-CE; atrial natriuretic peptide-converting enzyme; ACE: angiotensin-converting enzyme. BPI3: bactericidal/permeability-increasing protein 3; GAPDH: glyceraldehyde-3-phosphate dehydrogenase; Ester hydrolase: ester hydrolase C11orf54 homolog; EBP: emopamil-binding protein; WD88: WD repeat-containing protein 88. Error bars indicate one standard deviation. In bold shown 72 h significant fold-changes, *p*-value<0.05 (significance in [Dataset S4](#)).

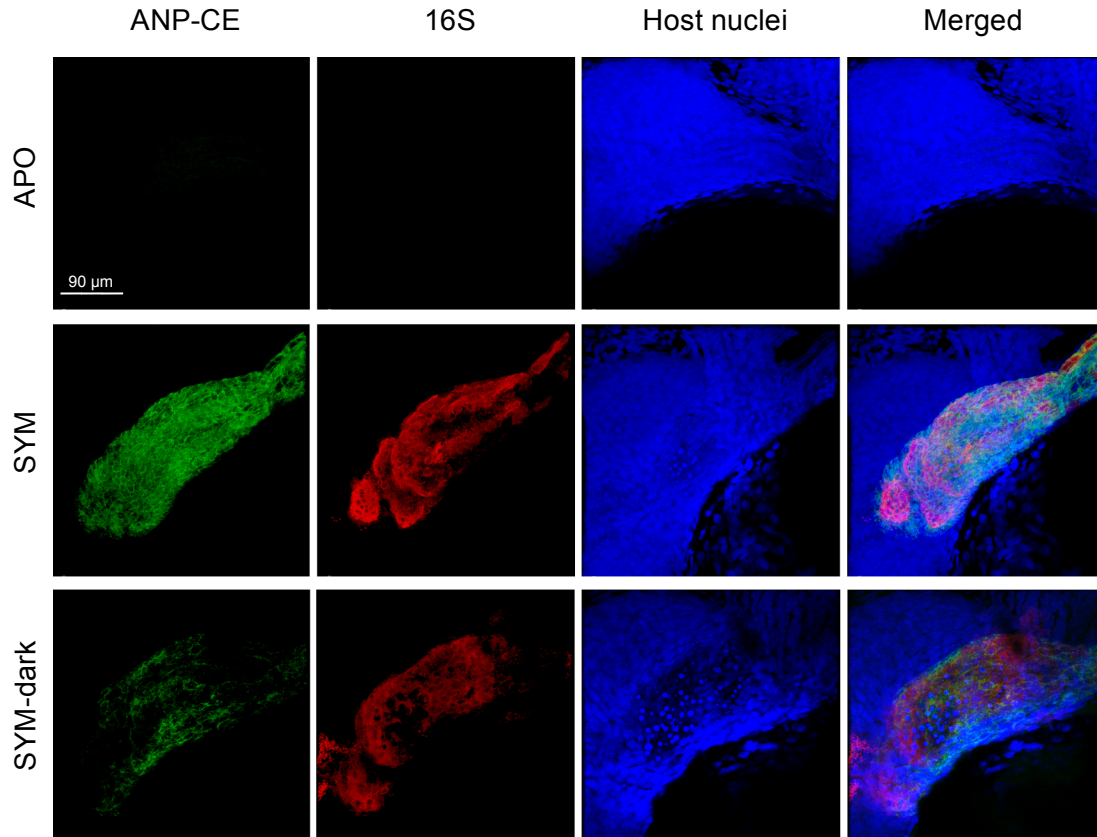

**Fig. S10. Visualization of ANP-CE transcript in whole-mount light organs 24 h after colonization.** Representative confocal images showing ANP-CE expression in crypt epithelium of APO, or SYM or SYM-dark colonized, juvenile squid; merged mid-section of Z-stack of crypt #1. Separate and merged channels: ANP-CE (green), 16S RNA (symbionts, red) and host nuclei (TOPRO, blue) ([Movies S1-S3](#)).

326



327  
328  
329  
330  
331

**Table S1.** Primer list for RT-qPCR

| <i>Gene</i>                                                  | <i>Primer name</i> | <i>Primer sequence (5' &gt; 3')</i> | <i>Primer reference</i> |
|--------------------------------------------------------------|--------------------|-------------------------------------|-------------------------|
| <b><i>S19 ribosomal protein</i></b>                          | 40S-qF3            | AAGGCTTTGTCCACCTTCT                 | This study              |
|                                                              | 40S-qR3            | TAAATGCTCCAACACCAGCA                |                         |
| <b><i>Serine hydroxymethyl transferase</i></b>               | HMT-qF             | GTCCTGGTGACAAGAGTGCAATGA            | (23)                    |
|                                                              | HMT-qR             | TTCCAGCAGAAAAGGCACGATAGGT           |                         |
| <b><i>Heat shock protein 90</i></b>                          | HSP90_F            | AGACTGCAAGGCTTCCATAAA               | This study              |
|                                                              | HSP90_R            | TTCCGAACAAGGAGGACAATA               |                         |
| <b><i>Galaxin 1</i></b>                                      | esgal1_Fq2         | GAACTCGAATCTGTTGTTCTGGCG            | (24)                    |
|                                                              | esgal1_Rq2         | GTTGGTTTCATGGTAACACGGCCA            |                         |
| <b><i>Titin-like</i></b>                                     | titin_Fq           | GCAAAAAGTCTTGGTGCTCA                | This study              |
|                                                              | titin_Rq           | TTGCAACATCTTTGGGCATA                |                         |
| <b><i>Tropomyosin</i></b>                                    | tropomy_Fq         | ATGCTGACCGGAAGTTTGAC                | This study              |
|                                                              | tropomy_Rq         | GTTGCCACAACCTTCAACT                 |                         |
| <b><i>Bactericidal/permeability-increasing protein 3</i></b> | BPI3_Fq            | GCCAAGTTCGAAATCGTAGC                | This study              |
|                                                              | BPI3_Rq            | AATCACCAACAACCGCAGTC                |                         |
| <b><i>Reflectin-like 3</i></b>                               | Ref13like_Fq       | GACATATCGAAGTATCTTTCTGGGTA          | This study              |
|                                                              | Ref13like_Rq       | GACAGGTGGGACGTTACTG                 |                         |
| <b><i>Angiotensin-converting enzyme-like isoform X1</i></b>  | ACE_Fq             | AGGTAATATGTGGGCGCAAG                | This study              |
|                                                              | ACE_Rq             | CGAAGACGGAGTTTTCCAG                 |                         |
| <b><i>Galaxin-like isoform X3</i></b>                        | galx3_Fq           | ACCCAACGACAATTCTTGC                 | This study              |
|                                                              | galx3_Rq           | CAGAGTTTTTCGCTGGTTGA                |                         |
| <b><i>Opsin</i></b>                                          | opsin2_Fq          | GTAACCGTTTTCCCCTCAT                 | This study              |
|                                                              | opsin2_Rq          | TCTGTGGCTCATATGCTTCG                |                         |
| <b><i>Reflectin 2d</i></b>                                   | Ref2d_F            | CAACCCATGTCCCCTATGAC                | This study              |
|                                                              | Ref2d_R            | GTCCATCATCCAGCCGTAGT                |                         |
| <b><i>Atrial natriuretic peptide-converting enzyme</i></b>   | ANPq_F             | CATTTCCACCAGCCTTCTCTC               | This study              |
|                                                              | ANPq_R             | ATTCGCTTTCGTCCACAACC                |                         |
| <b><i>WD repeat-containing 88-like</i></b>                   | WD88_Fq            | TGAATGGACACATGGATTGG                | This study              |
|                                                              | WD88_Rq            | CGAGGGTTGGTCACTTGAAT                |                         |
| <b><i>Emopamil-binding family-containing</i></b>             | EBP_Fq             | ATGGCAACATGAACGATTCC                | This study              |
|                                                              | EBP_Rq             | ATGCAAGAGGGACTGTGTGTC               |                         |
| <b><i>Ester hydrolase C11orf54 homolog isoform X1</i></b>    | EsterHy_Fq         | GGATGCACCTTTGATCTGCT                | This study              |
|                                                              | EsterHy_Rq         | GGCTCGGTATGACACTTCGT                |                         |
| <b><i>Serpin B3-like isoform X1</i></b>                      | serpinB3_Fq        | AGCCAGACAACCTGGAAGAGGT              | This study              |
|                                                              | serpinB3_Rq        | ATGCGGCTGACTGATTGA                  |                         |

332  
333  
334  
335  
336  
337  
338  
339  
340  
341  
342  
343  
344  
345

346  
347  
348

**Table S2.** HCR-FISH probe sequences

| Probe                          | Amplifier/Fluorophore | Probe sequence                                         |
|--------------------------------|-----------------------|--------------------------------------------------------|
| <i>E. scolopes</i> -ANP-CE #1  | B1 / Alexa 488        | GCTTGCCCTTATCAAACCTGGACAAAAAATATTCCTGCATAGAGTCCGAC     |
| <i>E. scolopes</i> -ANP-CE #2  | B1 / Alexa 488        | AACAGCTGTGCCCGACAGTCTTTCCTTGGCGACAACAGTACGTGCTGGTT     |
| <i>E. scolopes</i> -ANP-CE #3  | B1 / Alexa 488        | TACCACGGTTGTGGACGAAAGCGAATTGGTGCTCTCCCTTTGCACTGAGAT    |
| <i>E. scolopes</i> -ANP-CE #4  | B1 / Alexa 488        | ATCCTAACTCTCTGCAGACAACGTGAGGTTACTCTGAGACCAATATCCACA    |
| <i>E. scolopes</i> -ANP-CE #5  | B1 / Alexa 488        | CTGCGGGCTGCATATTGCACGTACACCAAGAGGTGCACCTTAGATATGGAGCA  |
| <i>E. scolopes</i> -ANP-CE #6  | B1 / Alexa 488        | GCTCCTGCGGAATGCATTCATAGTTAAGGCATTGGAATTGGTTCCGATCGCA   |
| <i>E. scolopes</i> -ANP-CE #7  | B1 / Alexa 488        | AACAATGGAATTCATCGGATCCGCTTTTGCAATTTCTGACGCCATCATTG     |
| <i>E. scolopes</i> -ANP-CE #8  | B1 / Alexa 488        | AGATGCCTTTACCGCGATAGACGGATGGACCAACTGAGGCATCTCTTTTCC    |
| <i>E. scolopes</i> -ANP-CE #9  | B1 / Alexa 488        | TTTTGTAACCGGGCAATACGGGATTCTTGCTGCTGCTCCTCTATAGGTA      |
| <i>E. scolopes</i> -ANP-CE #10 | B1 / Alexa 488        | CATCCTGACCGTATAGGATCATGGGATCATAAATTTGGAACCTCCGTGTTCC   |
| <i>E. scolopes</i> -ANP-CE #11 | B1 / Alexa 488        | TACAGTGTGCAGCTGTGAGAACGTGCCATCTGTCAACAATTGCTGCACCACA   |
| <i>E. scolopes</i> -ANP-CE #12 | B1 / Alexa 488        | CTATCGGCGAAGTCACACGCAATACAGCAATATCGTTGTGACAGTTTCACCTC  |
| <i>E. scolopes</i> -ANP-CE #13 | B1 / Alexa 488        | GTGGAACCCACGGTTTAGAAGGAAGACATATGGGTCGGATGTAATCAGTCAT   |
| <i>E. scolopes</i> -ANP-CE #14 | B1 / Alexa 488        | TCGATGTTGATTATTTGTCATGCGTCCCCAACCCGATAGAAAGCATTGCGT    |
| <i>E. scolopes</i> -ANP-CE #15 | B1 / Alexa 488        | GACCTCTGCAGCCTTTGTGTCCGAAGCTGACGAGTCCAACCTACTTCCCAATA  |
| <i>E. scolopes</i> -ANP-CE #16 | B1 / Alexa 488        | GGACCCAACCTTTTCATTGCATAAACATCGGTAAGAAGACAGCGAGTAGTATAC |
| <i>E. scolopes</i> -ANP-CE #17 | B1 / Alexa 488        | AGGACCTACCAGCCATTCGTTTTCGGACTGTTGCTTCCCTCCACTTTATTGT   |
| <i>E. scolopes</i> -ANP-CE #18 | B1 / Alexa 488        | GCAGGAATCTCCTATTTTCGGCGGTGGAGTTGTCGGCCTCTTGCATCTACTTC  |
| <i>E. scolopes</i> -ANP-CE #19 | B1 / Alexa 488        | ATGCGTGATGCTGATGTAACCTGAGAACGAGTGTTTTGACTCGGGCGTTTT    |
| <i>E. scolopes</i> -ANP-CE #20 | B1 / Alexa 488        | GTGCGAGTTTTCGAATAATGCGTCTGAACTGTAGTCAGCTGTTGGCTGTC     |
| <i>V. fischeri</i> -16S #1     | B3 / Alexa 546        | GTTCAATTAAGTCAGATGTGAAAGCCCGGGCTCAACCTCGGAACCGCATTG    |
| <i>V. fischeri</i> -16S #2     | B3 / Alexa 546        | ACTGGTGAACCTAGAGTCTGTAGAGGGGGGTAGAATTCAGGTGTAGCGGTG    |

349  
350  
351  
352  
353  
354  
355  
356  
357  
358  
359  
360  
361  
362  
363  
364  
365

366 **Caption for Movie S1.** Z-stack of confocal microscopy sections from a representative  
367 uncolonized (APO) light-organ crypt #1 (see Fig. 4B, top panel, for single image). The  
368 tissue was probed by HCR-FISH to localize symbiont 16S (green) and host ANP-CE  
369 (red) RNA, and counterstained to show the epithelial cell nuclei (blue).

370  
371

372 **Caption for Movie S2.** Z-stack of confocal microscopy sections from a representative  
373 wild-type *V. fischeri* colonized (SYM) light-organ crypt #1, produced from a Z-stack of  
374 confocal microscopy images (see Fig. 4B, middle panel, for single image). The tissue  
375 was probed by HCR-FISH to localize symbiont 16S (green) and host ANP-CE (red)  
376 RNA, and counterstained to show the epithelial cell nuclei (blue).

377  
378

379 **Caption for Movie S3.** Z-stack of confocal microscopy sections from a representative  
380 dark-mutant *V. fischeri* colonized (SYM-dark) light-organ crypt #1, produced from a Z-  
381 stack of confocal microscopy images (see Fig. 4B, lower panel, for single image). The  
382 tissue was probed by HCR-FISH to localize symbiont 16S (green) and host ANP-CE  
383 (red) RNA, and counterstained to show the epithelial cell nuclei (blue).

384  
385

386 **Dataset S1.** *E. scolopes* transcriptome gene expression description. Sheet 1: A  
387 description of the raw read counts of the samples sequenced in this study for the *E.*  
388 *scolopes* transcriptome. Sheet 2: Trinity Assembly Statistics. Sheet 3: Top-BLAST hits  
389 annotation for the *E. scolopes* transcriptome. Sheet 4: Functional annotation for the *E.*  
390 *scolopes* transcriptome.

391  
392

**Dataset S2.** Normalized transcript abundance expressed as FPKM.

393  
394

**Dataset S3.** Functional enrichment by tissue type. Sheet 1: GO terms enriched in light  
395 organ. Sheet 2: GO terms enriched in eye. Sheet 3: GO terms enriched in gill. Sheet 4:  
396 summary of the number of enriched genes by tissue type and number of enriched GO  
397 terms. Sheet 5: Enriched GO terms in all juvenile tissues. Sheet 6: Enriched GO terms in  
398 all adult tissues.

399  
400

**Dataset S4.** Host organ gene-expression data obtained by NanoString Technologies  
401 codeset. Sheet 1: NanoString Technologies probe sequences. Sheet 2: 72-h juvenile  
402 light-organ expression data. Sheet 3: Adult light-organ expression data. Sheet 4: 72-h  
403 juvenile eye expression data. Sheet 5: Adult eye expression data. Sheet 6: 72-h juvenile  
404 gill expression data. Sheet 7: Adult gill expression data.

405  
406

**Dataset S5.** Transcripts identified as differentially expressed in adult squids by edgeR.  
407 Sheet 1, 2: light organ, differently expressed transcripts, raw counts, and annotations.  
408 Sheet 3, 4: eye, differently expressed transcripts, raw counts, and annotations. Sheet 5,  
409 6: gill, differently expressed transcripts, raw counts, and annotations.

410  
411

**Dataset S6.** Functional enrichment in response to symbiosis. Sheet 1: GO terms  
412 enriched in light organ symbiosis-responsive genes. Sheet 2: GO terms enriched in eye  
413 symbiosis-responsive genes. Sheet 3: GO terms enriched in gill symbiosis-responsive  
414 genes. Sheet 4: Top 5 biological processes enriched within each tissue, as indicated in  
415 Fig. 2C.

416

417 **Dataset S7.** Transcripts Identified as Differentially Expressed in adult mice eye. Sheet  
418 1: A description of the raw read counts of the samples sequenced in this study for the *M.*  
419 *musculus* eye transcriptome. Sheet 2: Differentially expressed transcripts, raw counts  
420 per sample and annotation. Sheet 3: Functional annotation of differentially expressed  
421 transcripts.

422  
423 **Dataset S8.** Transcripts identified as differentially expressed in juvenile squid by edgeR.  
424 Sheet 1, 2: light organ differently expressed transcripts, raw counts, and its annotations  
425 in SYM vs APO pairwise comparisons. Sheet 3, 4: light organ differently expressed  
426 transcripts, raw counts, and its annotations in SYM-dark (LUX) vs APO pairwise  
427 comparisons. Sheet 5, 6: light organ, differently expressed transcripts, raw counts, and  
428 its annotations in SYM vs SYM-dark (LUX) pairwise comparisons. Sheet 7, 8: eye,  
429 differently expressed transcripts, raw counts, and its annotations in SYM vs APO  
430 pairwise comparisons.

431  
432 **Dataset S9.** Functional enrichment in response to symbiosis in juvenile squid. Sheet 1:  
433 GO terms enriched in juvenile light organ symbiosis-responsive genes. Sheet 2: GO  
434 terms enriched in juvenile light organ bioluminescence-specific response. Sheet 3: GO  
435 terms enriched in juvenile light organ bacteria-specific response (shared SYM and SYM-  
436 dark response). Sheet 4: GO terms enriched in symbiosis-shared response with adult  
437 light organ. Sheet 5: GO terms enriched in juvenile eye symbiosis-responsive genes

438  
439 **Dataset S10.** Functional gene-set enrichment analysis (GSEA). Sheet 1: Adult light  
440 organ GSEA analysis. Sheet 2: Adult eye GSEA analysis. Sheet 3: Adult gill GSEA  
441 analysis. Sheet 4: Juvenile light organ GSEA analysis. Sheet 5: Juvenile eye GSEA  
442 analysis.

443  
444

445 **References**

446

- 447 1. Naughton LM & Mandel MJ (2012) Colonization of *Euprymna scolopes* squid by  
448 *Vibrio fischeri*. *J Vis Exp* (61):e3758.
- 449 2. Boettcher KJ & Ruby EG (1990) Depressed light emission by symbiotic *Vibrio*  
450 *fischeri* of the sepiolid squid *Euprymna scolopes*. *J Bacteriol* 172(7):3701-3706.
- 451 3. Koch EJ, Miyashiro T, McFall-Ngai MJ, & Ruby EG (2014) Features governing  
452 symbiont persistence in the squid-vibrio association. *Mol Ecol* 23(6):1624-1634.
- 453 4. Bose JL, Rosenberg CS, & Stabb EV (2008) Effects of *luxCDABEG* induction in  
454 *Vibrio fischeri*: enhancement of symbiotic colonization and conditional attenuation  
455 of growth in culture. *Arch Microbiol* 190(2):169-183.
- 456 5. Graf J, Dunlap PV, & Ruby EG (1994) Effect of transposon-induced motility  
457 mutations on colonization of the host light organ by *Vibrio fischeri*. *J Bacteriol*  
458 176(22):6986-6991.
- 459 6. Kremer N, *et al.* (2013) Initial symbiont contact orchestrates host-organ-wide  
460 transcriptional changes that prime tissue colonization. *Cell Host Microbe*  
461 14(2):183-194.
- 462 7. Bolger AM, Lohse M, & Usadel B (2014) Trimmomatic: a flexible trimmer for  
463 Illumina sequence data. *Bioinformatics* 30(15):2114-2120.
- 464 8. Grabherr MG, *et al.* (2011) Full-length transcriptome assembly from RNA-Seq  
465 data without a reference genome. *Nat Biotechnol* 29(7):644-652.
- 466 9. Subramanian A, *et al.* (2005) Gene set enrichment analysis: a knowledge-based  
467 approach for interpreting genome-wide expression profiles. *Proc Natl Acad Sci U*  
468 *S A* 102(43):15545-15550.
- 469 10. Gotz S, *et al.* (2008) High-throughput functional annotation and data mining with  
470 the Blast2GO suite. *Nucleic Acids Res* 36(10):3420-3435.
- 471 11. Langmead B & Salzberg SL (2012) Fast gapped-read alignment with Bowtie 2.  
472 *Nat Methods* 9(4):357-359.
- 473 12. Li B & Dewey CN (2011) RSEM: accurate transcript quantification from RNA-Seq  
474 data with or without a reference genome. *BMC Bioinformatics* 12:323.
- 475 13. Robinson MD, McCarthy DJ, & Smyth GK (2010) edgeR: a Bioconductor  
476 package for differential expression analysis of digital gene expression data.  
477 *Bioinformatics* 26(1):139-140.
- 478 14. de Hoon MJ, Imoto S, Nolan J, & Miyano S (2004) Open source clustering  
479 software. *Bioinformatics* 20(9):1453-1454.
- 480 15. Vandesompele J, *et al.* (2002) Accurate normalization of real-time quantitative  
481 RT-PCR data by geometric averaging of multiple internal control genes. *Genome*  
482 *Biol* 3(7):RESEARCH0034.
- 483 16. Untergasser A, *et al.* (2012) Primer3--new capabilities and interfaces. *Nucleic*  
484 *Acids Res* 40(15):e115.
- 485 17. Matz MV, Wright RM, & Scott JG (2013) No control genes required: Bayesian  
486 analysis of qRT-PCR data. *PLoS One* 8(8):e71448.
- 487 18. Kim D & Salzberg SL (2011) TopHat-Fusion: an algorithm for discovery of novel  
488 fusion transcripts. *Genome Biol* 12(8):R72.
- 489 19. Li H (2011) A statistical framework for SNP calling, mutation discovery,  
490 association mapping and population genetical parameter estimation from  
491 sequencing data. *Bioinformatics* 27(21):2987-2993.
- 492 20. Liao Y, Smyth GK, & Shi W (2014) featureCounts: an efficient general purpose  
493 program for assigning sequence reads to genomic features. *Bioinformatics*  
494 30(7):923-930.

- 495 21. Nikolakakis K, Lehnert E, McFall-Ngai MJ, & Ruby EG (2015) Use of  
496 hybridization chain reaction-fluorescent *in situ* hybridization to track gene  
497 expression by both partners during initiation of symbiosis. *Appl Environ Microbiol*  
498 81(14):4728-4735.
- 499 22. Schindelin J, *et al.* (2012) Fiji: an open-source platform for biological-image  
500 analysis. *Nat Methods* 9(7):676-682.
- 501 23. Wier AM, *et al.* (2010) Transcriptional patterns in both host and bacterium  
502 underlie a daily rhythm of anatomical and metabolic change in a beneficial  
503 symbiosis. *Proc Natl Acad Sci U S A* 107(5):2259-2264.
- 504 24. Heath-Heckman EA, *et al.* (2014) Shaping the microenvironment: evidence for  
505 the influence of a host galaxin on symbiont acquisition and maintenance in the  
506 squid-*Vibrio* symbiosis. *Environ Microbiol* 16(12):3669-3682.  
507
